# Supplementary material for: High-quality SiNx thin-film growth at 300 °C using atomic layer deposition with hollow-cathode plasma
Source: Royal Society of Chemistry journal article supplement (doi:10.1039/d3tc00475a), 2023-01-01
Supplement: d3tc00475a1.pdf [file d3tc00475a1.pdf]

## Supplementary Information

# High-quality SiN<sub>x</sub> Thin Film Growth at 300 °C Using Atomic Layer Deposition with Hollow Cathode Plasma

Jae Chan Park,<sup>a,†</sup> Dae Hyun Kim,<sup>a,b,†</sup> Tae Jun Seok,<sup>a,c</sup> Dae Woong Kim,<sup>a,d</sup> Ji-Hoon Ahn,<sup>a</sup> Woo-Hee Kim,<sup>\*,a</sup> and Tae Joo Park<sup>\*,a</sup>

<sup>a</sup>Department of Materials Science and Chemical Engineering, Hanyang University, Ansan 15588, Republic of Korea

<sup>b</sup>Revolutionary Technology Center, SK Hynix, Icheon 17336, Republic of Korea

<sup>c</sup>Foundry Business, Samsung Electronics, Hwasung 18448, Republic of Korea

<sup>d</sup>Advanced Materials Research Team, Hyundai Motor Company, Uiwang 16082, Republic of Korea

<sup>†</sup>These authors contributed equally to this work.

\*E-mail: tjp@hanyang.ac.kr; wooheekim@hanyang.ac.kr

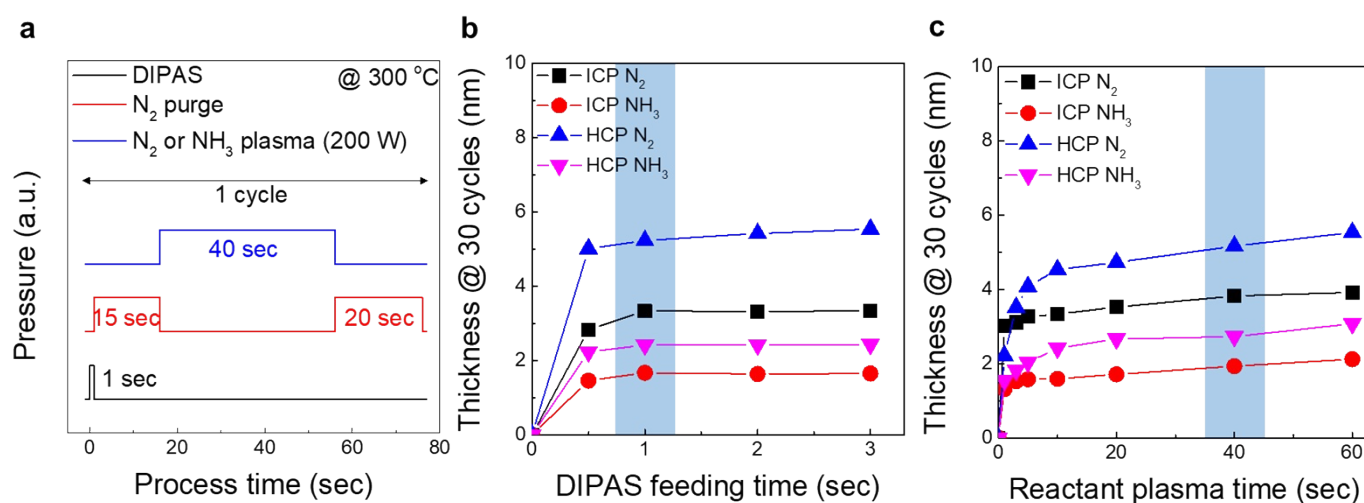

**Fig. S1** (a) ALD process recipe for the SiN<sub>x</sub> film using DIPAS and N<sub>2</sub> or NH<sub>3</sub> HCP. Growth-saturated condition was obtained with (b) DIPAS precursor feeding time of 1 s and (c) plasma pulse time of 40 s.

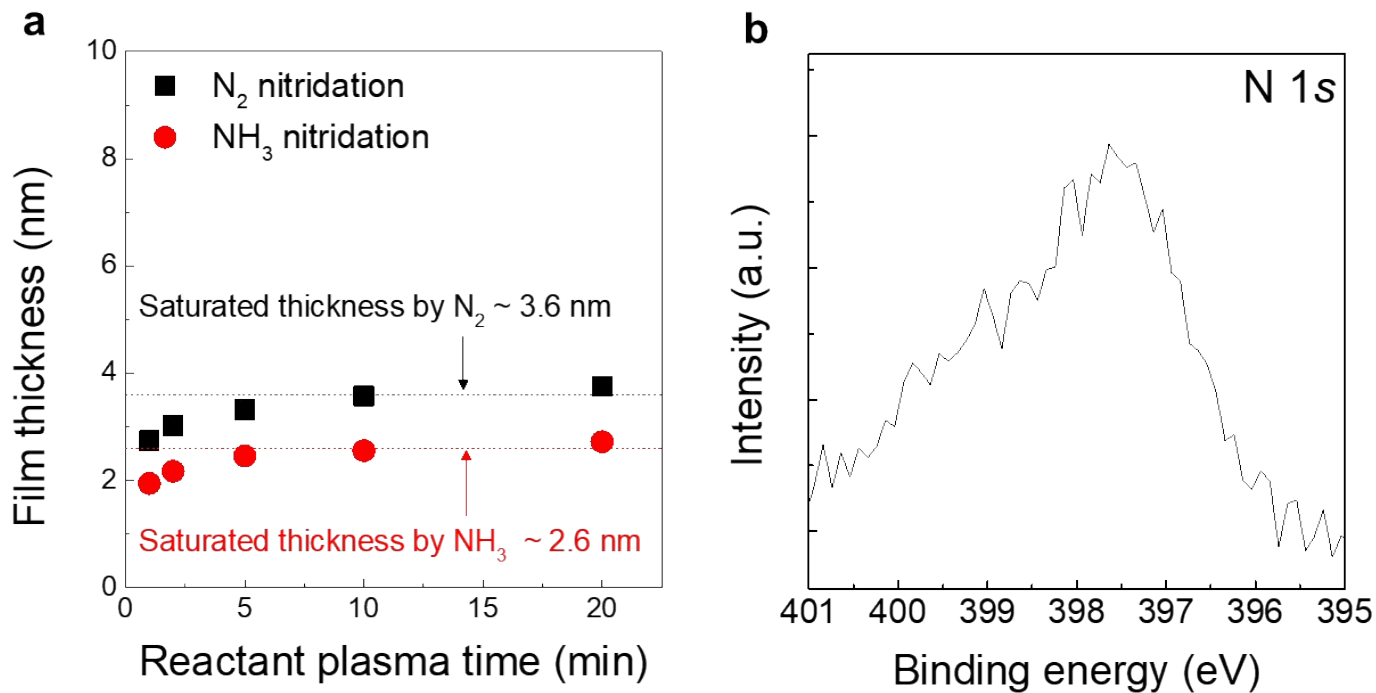

**Fig. S2** (a) Change in thickness of the surface nitride layer grown using N<sub>2</sub> or NH<sub>3</sub> HCP on Si substrate as a function of plasma exposure time. (b) N 1s core level XPS spectra of the surface nitride layer.

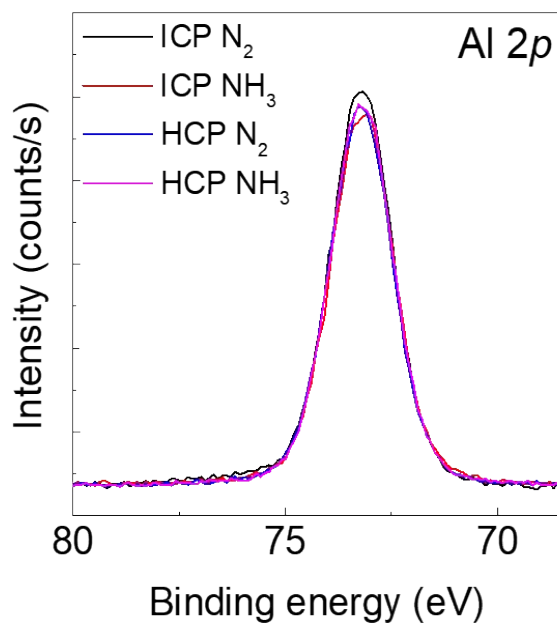

**Fig. S3** Al 2p core level XPS spectra of all SiN<sub>x</sub> films.

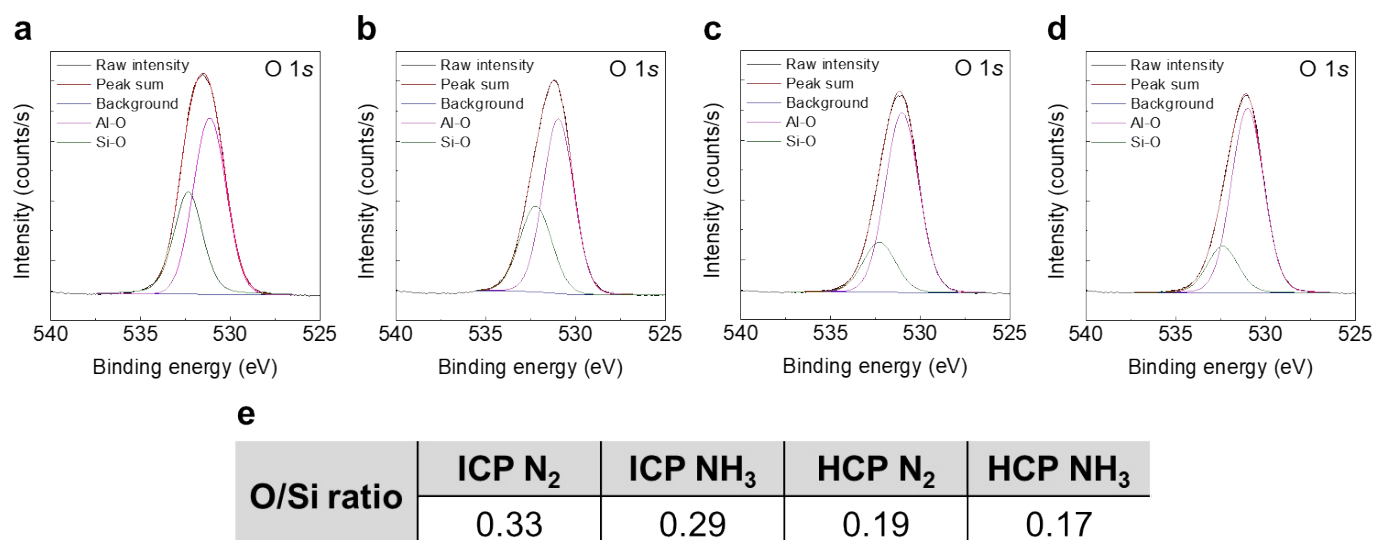

**Fig. S4** O 1s core level XPS spectra of the SiN<sub>x</sub> films grown using (a) ICP N<sub>2</sub>, (b) ICP NH<sub>3</sub>, (c) HCP N<sub>2</sub> and (d) HCP NH<sub>3</sub> process, respectively. Each deconvoluted spectrum indicates the Al–O or Si–O bonding. (e) The O/Si ratio of the each SiN<sub>x</sub> films calculated using the peak areas.
